# Supplementary material for: Dissolved Nitric Oxide in the Lower Elbe Estuary and the Hamburg Port Area
Source: Copernicus journal article supplement (doi:10.5194/egusphere-2023-3009), 2023-12-21
Supplement: Supplementary file 1 [file egusphere-2023-3009-supplement.pdf]

# Dissolved Nitric Oxide in the Lower Elbe Estuary and the Hamburg Port Area

Riel Carlo O. Ingeniero<sup>1</sup>, Gesa Schulz<sup>2,3</sup>, Hermann W. Bange<sup>1</sup>

5 <sup>1</sup>Marine Biogeochemistry Research Group, GEOMAR Helmholtz Centre for Ocean Research Kiel, Düsternbrooker Weg 20, Kiel, 24105 Germany

<sup>2</sup>Institute of Geology, Center for Earth System Research and Sustainability (CEN), Universität Hamburg, Hamburg, 20146, Germany

<sup>3</sup>Institute of Carbon Cycles, Helmholtz-Zentrum Hereon, Geesthacht, 21502, Germany

10 *Correspondence to:* Riel Carlo O. Ingeniero (ringeniero@geomar.de)

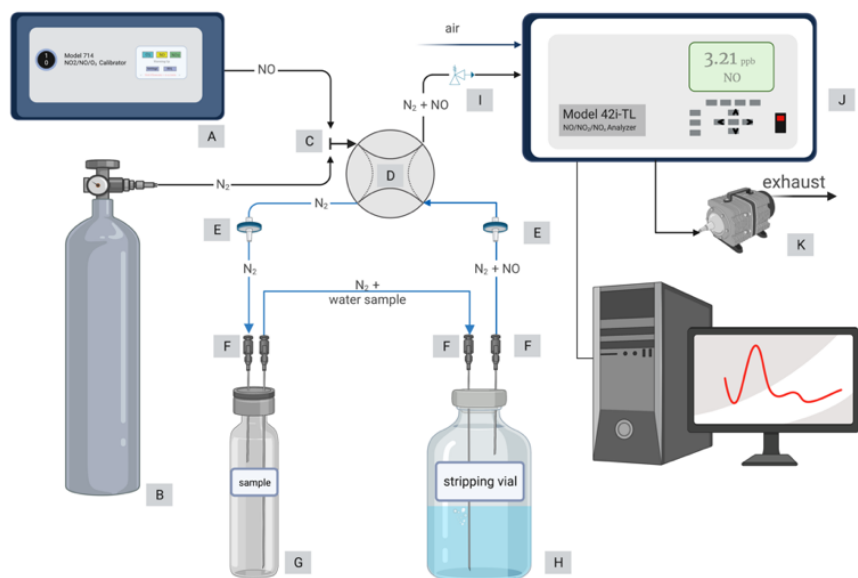

Figure S1: Schematic diagram of the updated NO measurement system. The system consists of a chemiluminescence detector connected to a stripping unit, including A: portable nitric oxide calibrator, B: nitrogen gas source connected to a mass flow controller, C: three-way gas valve to switch between NO calibrator gas and nitrogen gas source, D: four-way valve to switch between calibration mode and analysis mode, E: inline filters, F: Luer lock valve to close and isolate the line from the atmosphere when moving to the next sample, G: 50 mL sample vial, H: 100 mL stripping vial, I: needle valve, J: NO detector, K: vacuum pump.

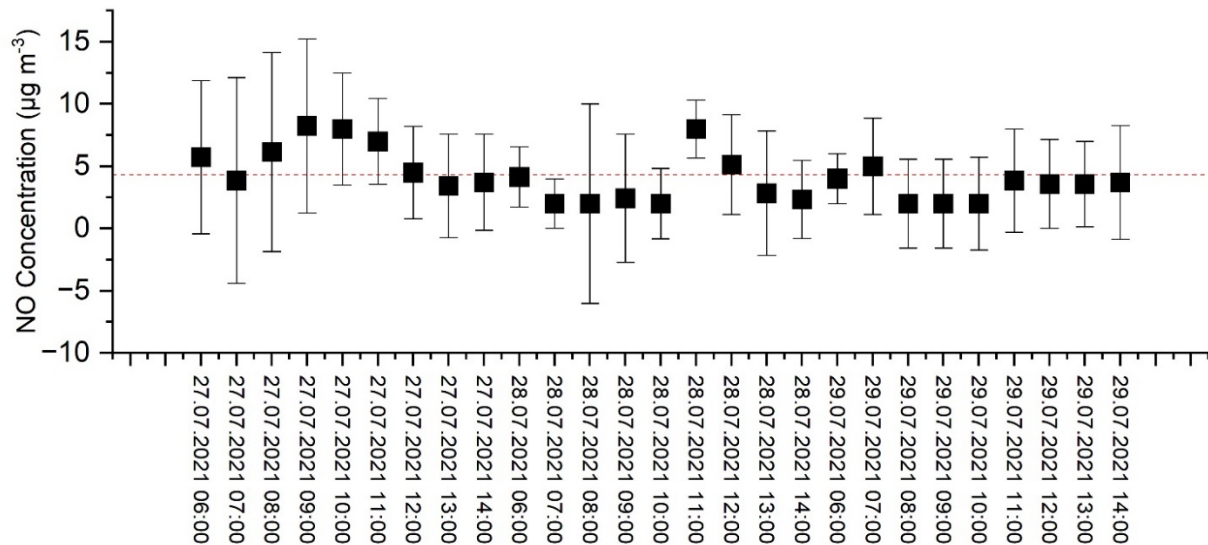

20

Figure S2: Average hourly atmospheric NO concentration ( $\mu\text{g m}^{-3}$ ) measured in seven background monitoring stations near the Elbe Estuary (AltonaElbhang, Billbrook, FinkenwerderAirbus, FinkenwerderWest, HafenKIGrasbrook, Veddel, and Wilhelmsburg) in Hamburg representative of the time of sampling. Shown in the red dashed line is the average concentration of  $4.3 \mu\text{g m}^{-3}$ . These data were obtained from <https://luft.hamburg.de/> (last accessed on 2 May 2023).

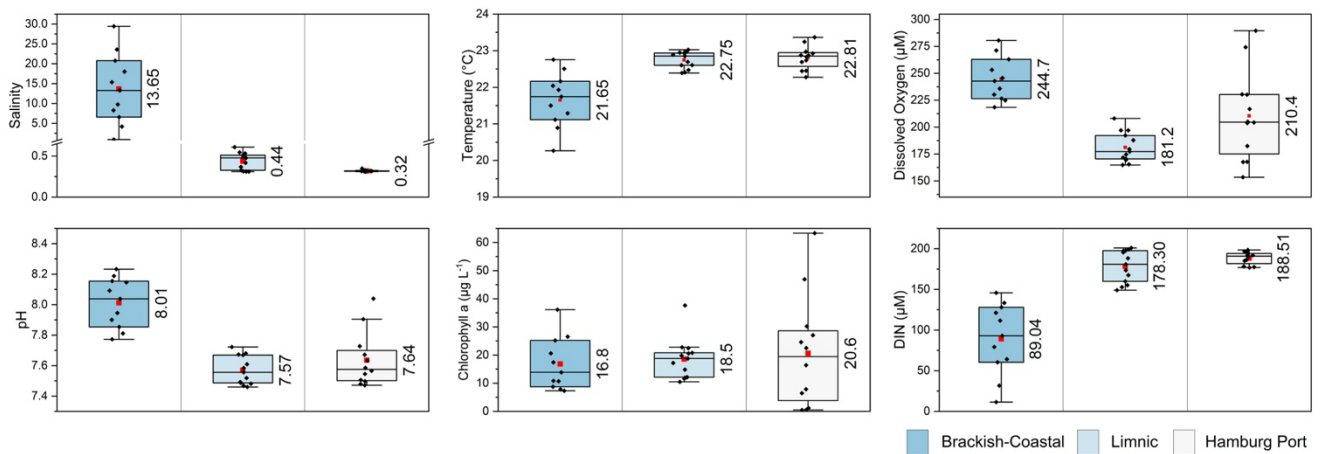

25

Figure S3: Boxplot of selected biogeochemical parameters measured in the different sampling stations along the Elbe Estuary during the campaign.

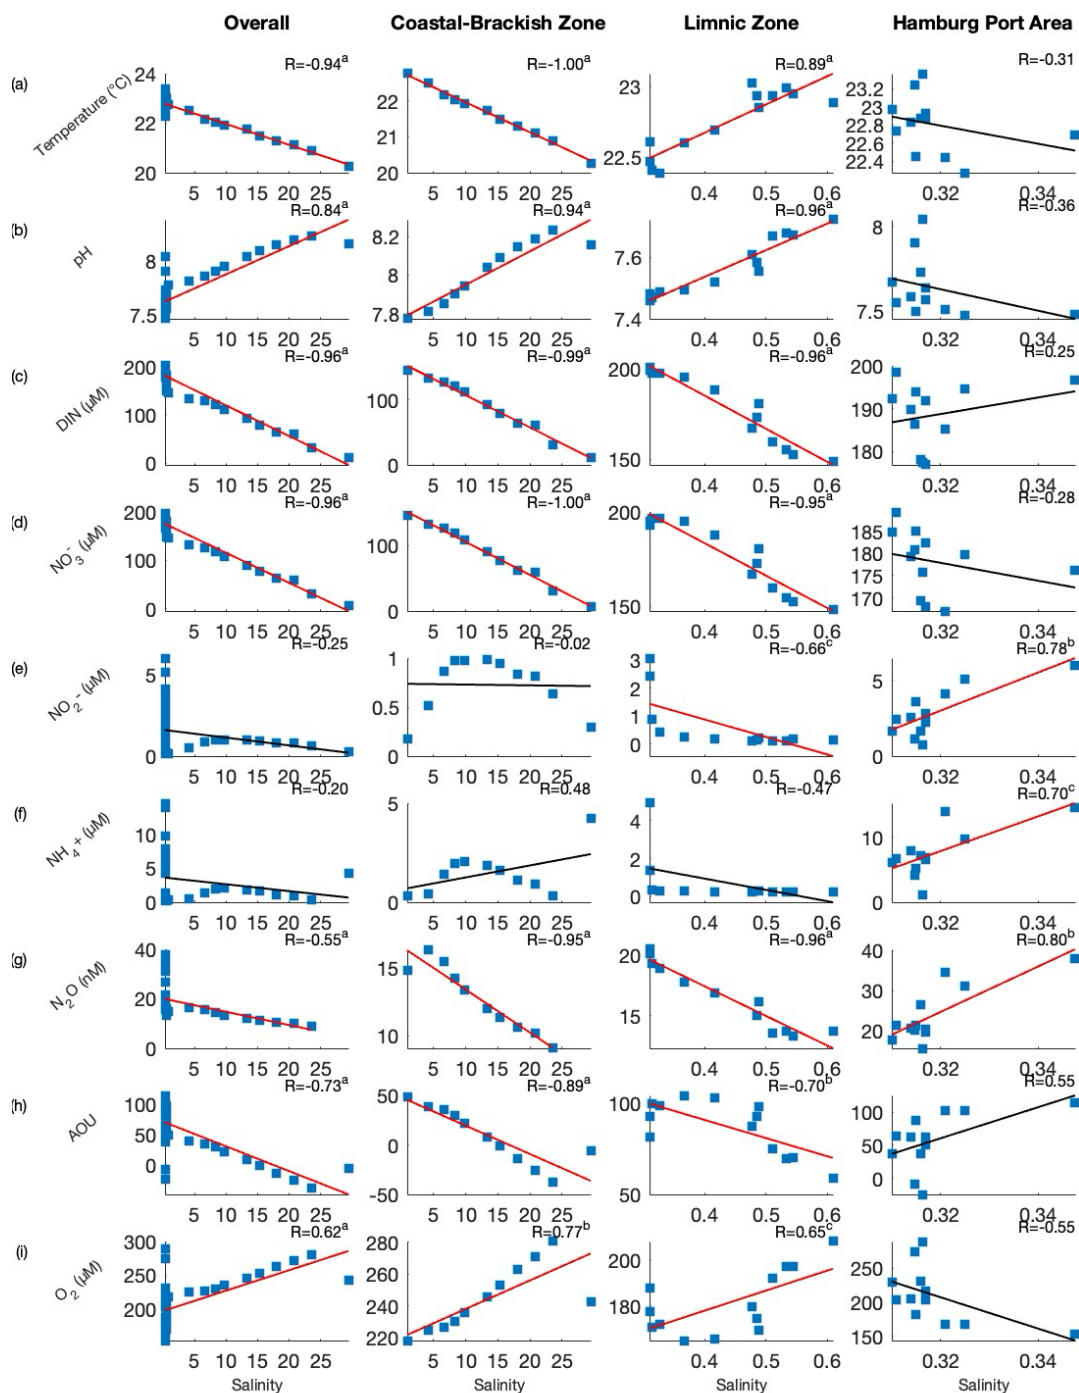

**Figure S4: Scatter plot and linear regression of salinity vs selected biogeochemical parameters in the Elbe Estuary and in each salinity zone. Pearson correlation coefficient (R) for each plot is denoted above each subplot. Significant correlations are denoted with a red regression line. Note that the superscripts on the R-value indicate a significant correlation at <sup>a</sup>  $p < 0.001$ , <sup>b</sup>  $p < 0.01$ , and <sup>c</sup>  $p < 0.05$ .**

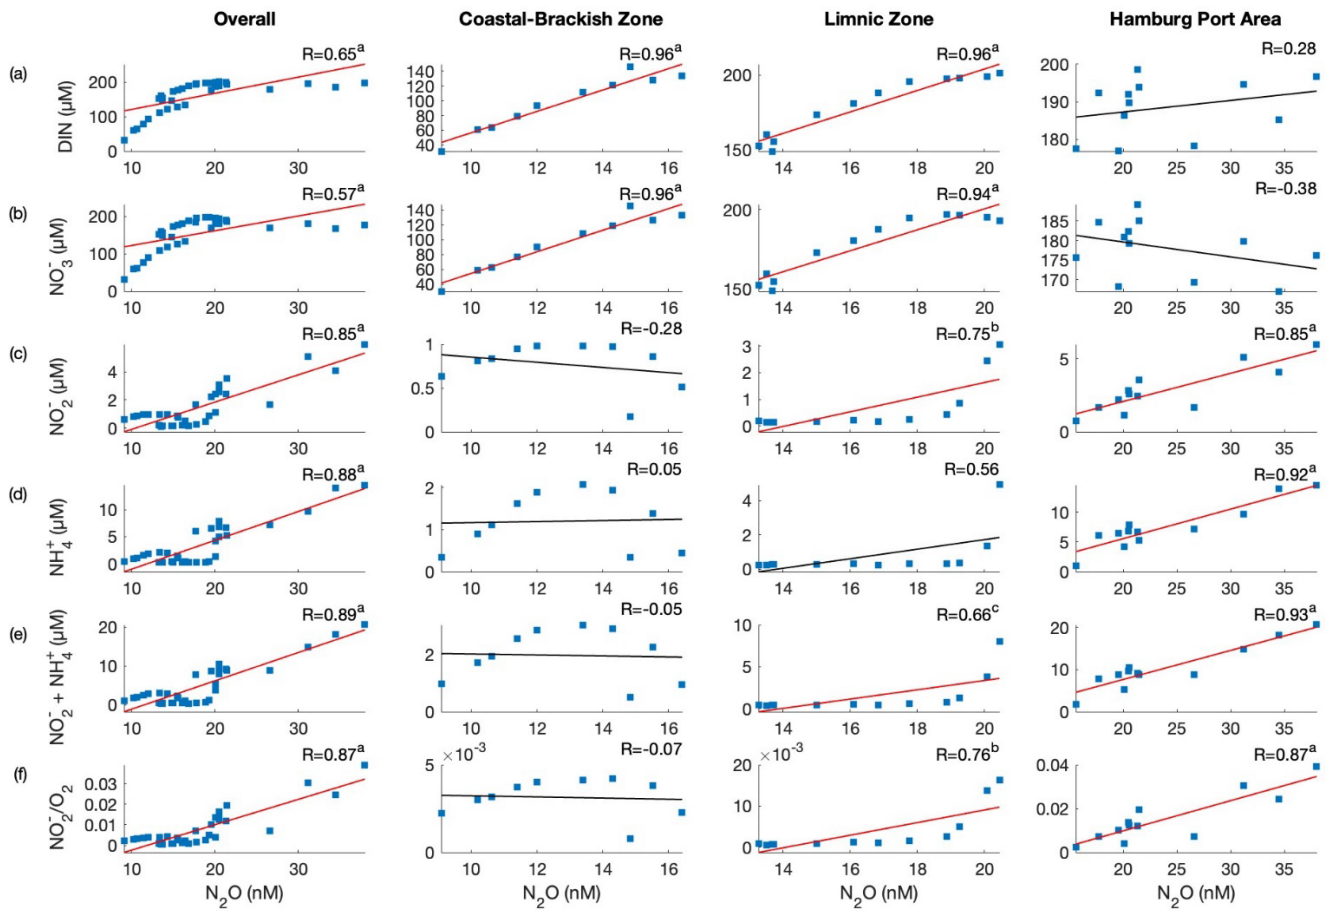

Figure S5: Scatter plots and linear regression between  $N_2O$  and DIN,  $\text{NO}_3^-$ ,  $\text{NO}_2^-$ ,  $\text{NH}_4^+$ , sum of  $\text{NO}_2^-$  and  $\text{NH}_4^+$  ( $\mu\text{M}$ ), and  $\text{NO}_2^-/\text{O}_2$  ratio. Pearson correlation coefficient (R) for each plot is denoted above each subplot. Significant correlations are denoted with a red regression line. Note that the superscripts on the R-value indicate significant correlation at <sup>a</sup>  $p < 0.001$ , <sup>b</sup>  $p < 0.01$ , and <sup>c</sup>  $p < 0.05$ .

35

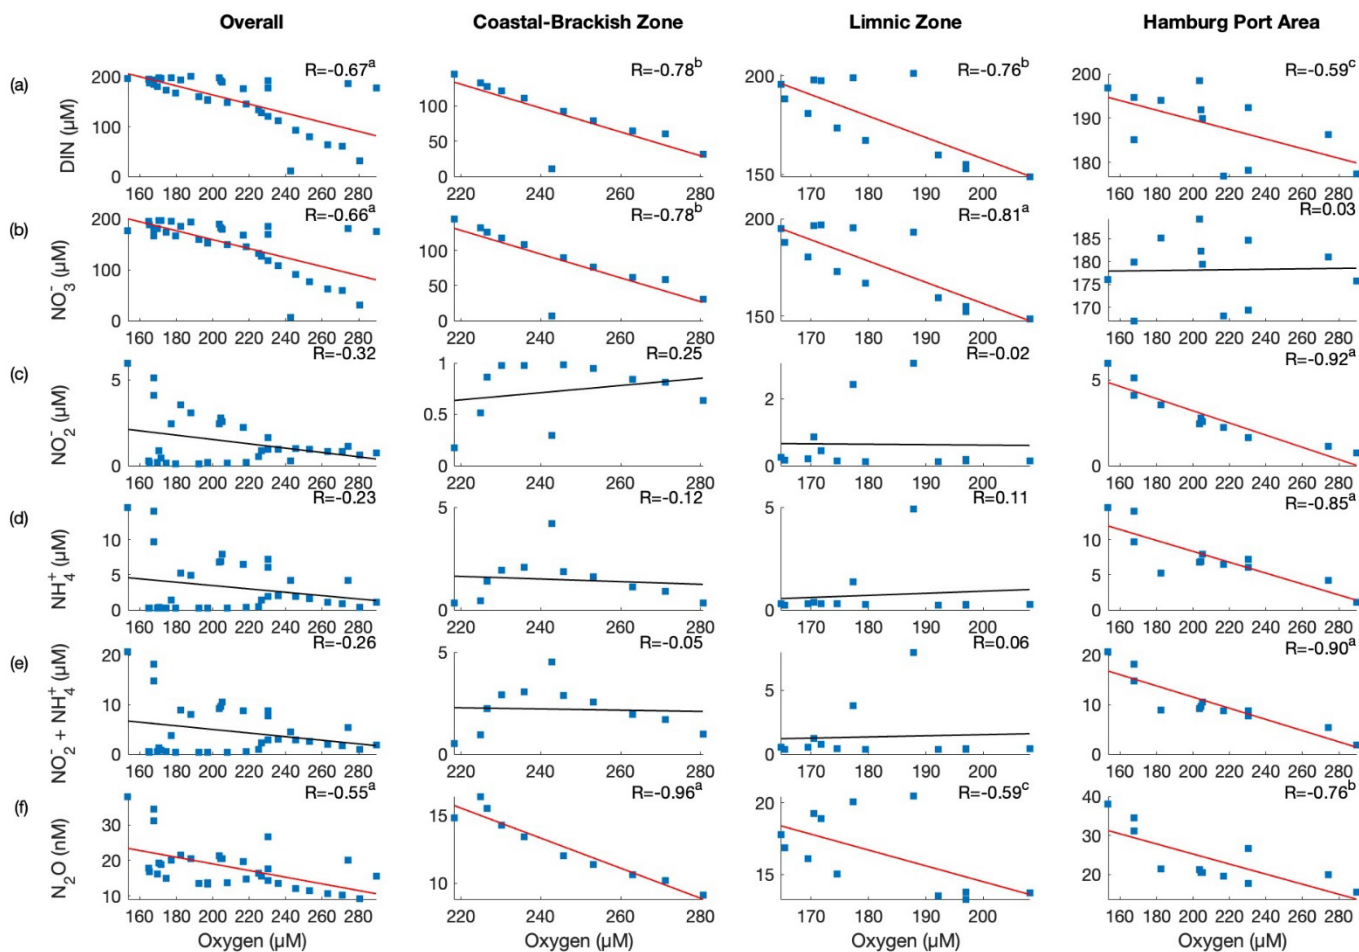

40 **Figure S6: Scatter plots and linear regression between dissolved O<sub>2</sub> and DIN, NO<sub>3</sub><sup>-</sup>, NO<sub>2</sub><sup>-</sup>, NH<sub>4</sub><sup>+</sup>, sum of NO<sub>2</sub><sup>-</sup> and NH<sub>4</sub><sup>+</sup> (μM), and N<sub>2</sub>O. Pearson correlation coefficient (R) for each plot is denoted above each subplot. Significant correlations are denoted with a red regression line. Note that the superscripts on the R-value indicate a significant correlation at <sup>a</sup> p < 0.001, <sup>b</sup> p < 0.01, and <sup>c</sup> p < 0.05.**

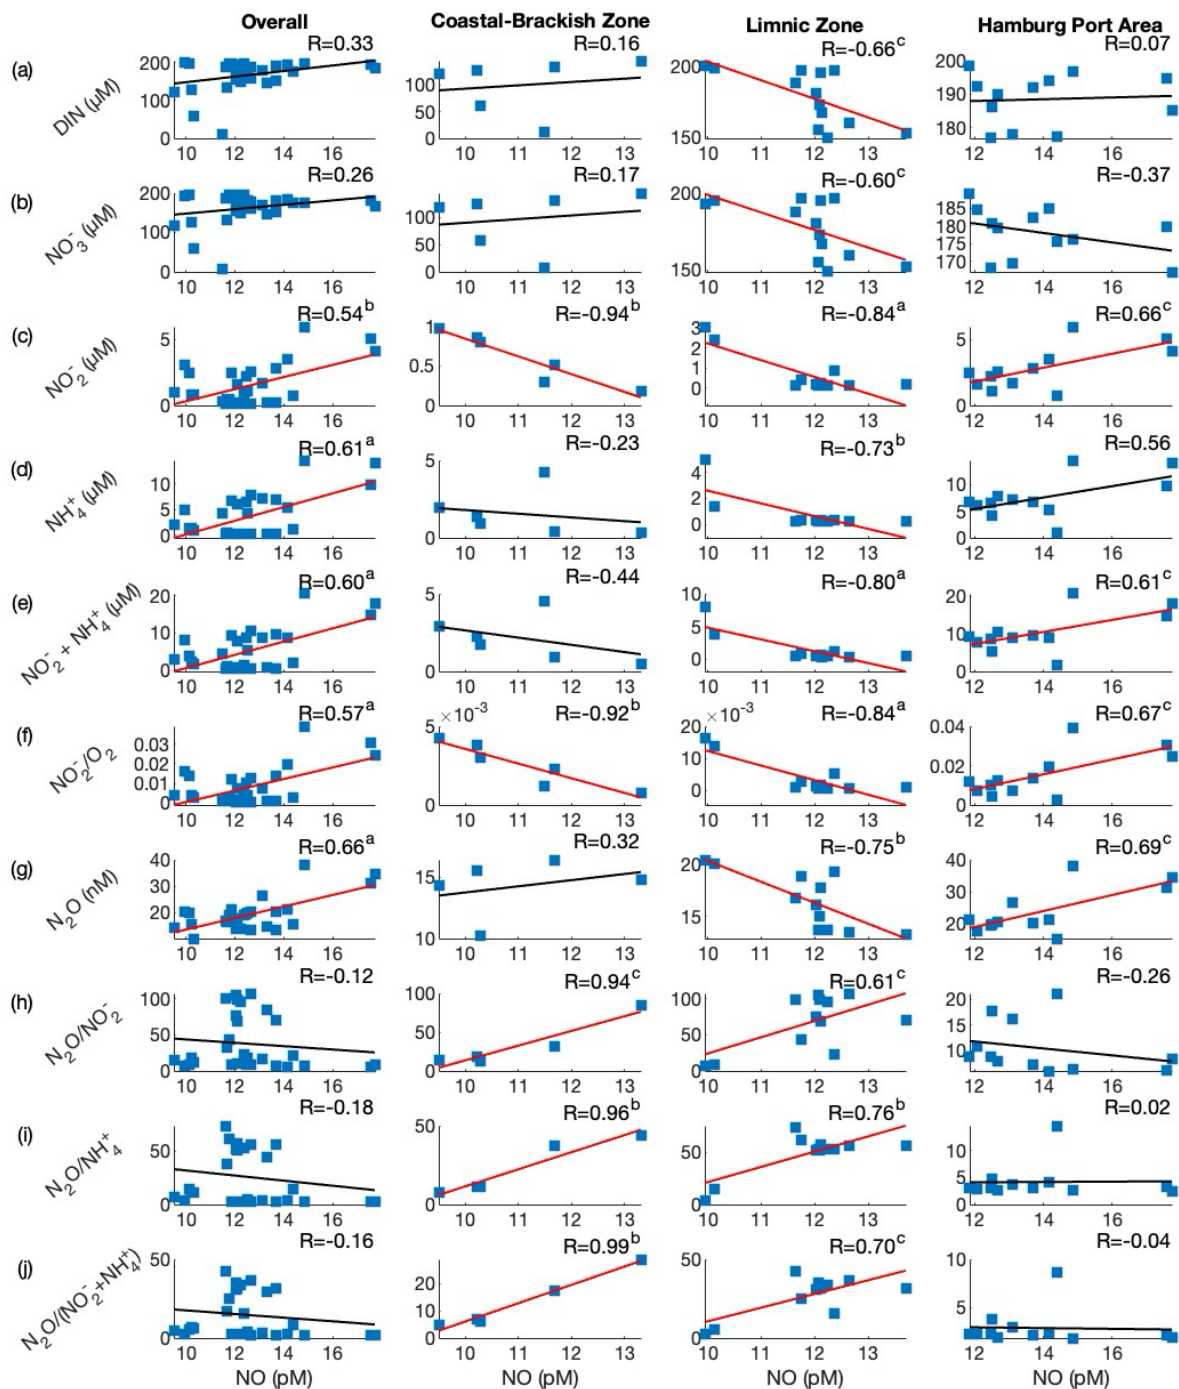

45 **Figure S7: Scatter plots and linear regression between NO and DIN,  $\text{NO}_3^-$ ,  $\text{NO}_2^-$ ,  $\text{NH}_4^+$ , sum of  $\text{NO}_2^- + \text{NH}_4^+$  ( $\mu\text{M}$ ),  $\text{NO}_2^-/\text{O}_2$  ratio,  $\text{N}_2\text{O}$ ,  $\text{N}_2\text{O}/\text{NO}_2^-$  ratio,  $\text{N}_2\text{O}/\text{NH}_4^+$  ratio, and  $\text{N}_2\text{O}/(\text{NO}_2^- + \text{NH}_4^+)$ . Pearson correlation coefficient (R) for each plot is denoted above each subplot. Significant correlations are denoted with a red regression line. Note that the superscripts on the R-value indicate a significant correlation at <sup>a</sup>  $p < 0.001$ , <sup>b</sup>  $p < 0.01$ , and <sup>c</sup>  $p < 0.05$ .**

**Table S1: Summary statistics of various biogeochemical parameters measured in the different sampling stations along the Elbe Estuary during the campaign. Note that values less than the detection limit and blanks were not included in the calculation of the mean and median.**

| Biogeochemical Parameters                                             | Mean                     | Minimum                  | Maximum                  | Standard Deviation       | Median                   |
|-----------------------------------------------------------------------|--------------------------|--------------------------|--------------------------|--------------------------|--------------------------|
| Salinity                                                              | 4.43                     | 0.31                     | 29.43                    | 7.77                     | 0.45                     |
| Temperature (°C)                                                      | 22.43                    | 20.27                    | 23.37                    | 0.69                     | 22.65                    |
| pH                                                                    | 7.73                     | 7.46                     | 8.23                     | 0.24                     | 7.67                     |
| Dissolved Oxygen (μM)                                                 | 210.4                    | 153.5                    | 289.6                    | 37.6                     | 204.6                    |
| Oxygen saturation (%)                                                 | 80.2                     | 57.1                     | 115.6                    | 16.5                     | 76.5                     |
| Ammonium (μM)                                                         | 3.22                     | 0.23                     | 14.62                    | 3.89                     | 1.37                     |
| Nitrite (μM)                                                          | 1.40                     | 0.12                     | 5.99                     | 1.48                     | 0.86                     |
| Nitrate (μM)                                                          | 149.82                   | 6.85                     | 196.89                   | 49.88                    | 168.78                   |
| DIN (μM)                                                              | 154.43                   | 11.35                    | 201.03                   | 51.49                    | 177.17                   |
| Chlorophyll a (μg L <sup>-1</sup> )                                   | 18.7                     | 0.5                      | 63.3                     | 12.9                     | 17.3                     |
| N <sub>2</sub> O (ppm)                                                | 0.70                     | 0.37                     | 1.46                     | 0.24                     | 0.64                     |
| N <sub>2</sub> O (nM)                                                 | 18.04                    | 9.09                     | 38.00                    | 6.51                     | 16.63                    |
| N <sub>2</sub> O saturation (%)                                       | 210.12                   | 110.14                   | 440.46                   | 75.17                    | 192.35                   |
| N <sub>2</sub> O flux density (μmol L <sup>-1</sup> d <sup>-1</sup> ) | 44.12                    | 3.37                     | 133.01                   | 32.53                    | 35.10                    |
| Wind Speed (m s <sup>-1</sup> )                                       | 5.78                     | 1.76                     | 13.11                    | 2.12                     | 5.02                     |
| NO (pM)                                                               | 12.5                     | 9.5                      | 17.7                     | 1.9                      | 12.1                     |
| NO flux density (mol m <sup>-2</sup> s <sup>-1</sup> )                | 2.40 × 10 <sup>-13</sup> | 3.08 × 10 <sup>-15</sup> | 5.52 × 10 <sup>-13</sup> | 1.54 × 10 <sup>-13</sup> | 2.21 × 10 <sup>-13</sup> |
| NO saturation (%)                                                     | 194                      | 147                      | 275                      | 29                       | 188                      |

**Table S2: Pearson correlation coefficient (R) between salinity and some biogeochemical parameters at each salinity zones. Note that significant correlations are in bold font and the superscripts indicate significant correlation at <sup>a</sup> p < 0.001, <sup>b</sup> p < 0.01, and <sup>c</sup> p < 0.05.**

|                                                                                       | Overall                    | Coastal-Brackish           | Limnic                     | Hamburg Port              |
|---------------------------------------------------------------------------------------|----------------------------|----------------------------|----------------------------|---------------------------|
| Temperature (°C)                                                                      | <b>0.8897<sup>a</sup></b>  | <b>0.9936<sup>a</sup></b>  | <b>0.7912<sup>a</sup></b>  | 0.0966                    |
| pH                                                                                    | <b>0.7056<sup>a</sup></b>  | <b>0.8770<sup>a</sup></b>  | <b>0.9187<sup>a</sup></b>  | 0.1263                    |
| Chlorophyll a (mg L <sup>-1</sup> )                                                   | 0.0016                     | 0.2650                     | 0.0332                     | 0.0668                    |
| DIN (μM)                                                                              | <b>0.9139<sup>a</sup></b>  | <b>0.9878<sup>a</sup></b>  | <b>0.9256<sup>a</sup></b>  | 0.0628                    |
| NO <sub>3</sub> <sup>-</sup> (μM)                                                     | <b>0.9286<sup>a</sup></b>  | <b>0.9907<sup>a</sup></b>  | <b>0.9001<sup>a</sup></b>  | 0.0793                    |
| NO <sub>2</sub> <sup>-</sup> (μM)                                                     | 0.0622                     | 0.0006                     | <b>0.4392<sup>c</sup></b>  | <b>0.6146<sup>b</sup></b> |
| NO <sub>2</sub> <sup>-</sup> /O <sub>2</sub> ratio                                    | -0.2672                    | -0.1534                    | -0.6801                    | <b>0.8272<sup>a</sup></b> |
| NH <sub>4</sub> <sup>+</sup> (μM)                                                     | 0.0408                     | 0.2276                     | 0.2230                     | <b>0.4906<sup>c</sup></b> |
| NO <sub>2</sub> <sup>-</sup> + NH <sub>4</sub> <sup>+</sup> (μM)                      | -0.2198                    | 0.4538                     | <b>-0.5704<sup>c</sup></b> | <b>0.7502<sup>b</sup></b> |
| O <sub>2</sub> (μM)                                                                   | <b>0.3895<sup>a</sup></b>  | <b>0.5988<sup>b</sup></b>  | <b>0.4214<sup>c</sup></b>  | 0.3055                    |
| O <sub>2</sub> saturation (%)                                                         | <b>0.7312<sup>a</sup></b>  | <b>0.8828<sup>a</sup></b>  | <b>0.6829<sup>c</sup></b>  | -0.5448                   |
| AOU                                                                                   | <b>0.5266<sup>a</sup></b>  | <b>0.7864<sup>a</sup></b>  | <b>0.4873<sup>b</sup></b>  | 0.2972                    |
| N <sub>2</sub> O (nM)                                                                 | <b>0.2977<sup>a</sup></b>  | <b>0.9098<sup>a</sup></b>  | <b>0.9248<sup>a</sup></b>  | <b>0.6403<sup>c</sup></b> |
| N <sub>2</sub> O saturation (%)                                                       | <b>-0.5349<sup>b</sup></b> | <b>-0.9454<sup>a</sup></b> | <b>-0.9634<sup>a</sup></b> | <b>0.8005<sup>b</sup></b> |
| N <sub>2</sub> O/NO <sub>2</sub> <sup>-</sup> ratio                                   | -0.2855                    | <b>-0.6505<sup>c</sup></b> | <b>0.8151<sup>b</sup></b>  | -0.3166                   |
| N <sub>2</sub> O/NH <sub>4</sub> <sup>+</sup> ratio                                   | -0.2210                    | -0.4213                    | 0.4192                     | -0.1390                   |
| N <sub>2</sub> O/(NO <sub>2</sub> <sup>-</sup> + NH <sub>4</sub> <sup>+</sup> ) ratio | -0.2560                    | -0.5910                    | <b>0.7077<sup>c</sup></b>  | -0.1788                   |
| NO (pM)                                                                               | 0.1073                     | 0.0598                     | <b>0.4122<sup>c</sup></b>  | 0.2366                    |
| NO flux density (mol cm <sup>-2</sup> s <sup>-1</sup> )                               | <b>0.2846<sup>b</sup></b>  | 0.3185                     | 0.0557                     | 0.0771                    |
| NO saturation (%)                                                                     | 0.1073                     | 0.0598                     | <b>0.4122<sup>c</sup></b>  | 0.2366                    |



**Table S3: Pearson correlation coefficient (R) between NO concentration and some biogeochemical parameters at each salinity zones. Note that significant correlations are in bold font and the superscripts indicate significant correlation at <sup>a</sup> p < 0.001, <sup>b</sup> p < 0.01, and <sup>c</sup> p < 0.05.**

|                                                                                  | Overall                   | Coastal-Brackish           | Limnic                     | Hamburg Port               |
|----------------------------------------------------------------------------------|---------------------------|----------------------------|----------------------------|----------------------------|
| Temperature (°C)                                                                 | 0.2395                    | 0.2742                     | 0.4991                     | <b>-0.6102<sup>c</sup></b> |
| pH                                                                               | -0.2875                   | -0.3408                    | <b>0.6174<sup>c</sup></b>  | -0.3437                    |
| Oxygen (μM)                                                                      | -0.2407                   | -0.4052                    | 0.2258                     | -0.5204                    |
| Oxygen saturation (%)                                                            | -0.2735                   | -0.3509                    | 0.2515                     | -0.5204                    |
| AOU                                                                              | 0.2769                    | 0.3646                     | -0.2614                    | 0.5257                     |
| Chlorophyll a (mg L <sup>-1</sup> )                                              | -0.0439                   | 0.1488                     | -0.3420                    | -0.2240                    |
| Salinity                                                                         | -0.3276                   | -0.2446                    | <b>0.6420<sup>c</sup></b>  | 0.4864                     |
| DIN (μM)                                                                         | 0.3263                    | 0.1630                     | <b>-0.6576<sup>c</sup></b> | 0.0677                     |
| NO <sub>2</sub> <sup>-</sup> (μM)                                                | <b>0.5425<sup>b</sup></b> | <b>-0.9419<sup>b</sup></b> | <b>-0.8379<sup>a</sup></b> | <b>0.6570<sup>c</sup></b>  |
| NO <sub>3</sub> <sup>-</sup> (μM)                                                | 0.2552                    | 0.1715                     | <b>-0.5998<sup>c</sup></b> | -0.3726                    |
| NH <sub>4</sub> <sup>+</sup> (μM)                                                | <b>0.6051<sup>a</sup></b> | -0.2267                    | <b>-0.7322<sup>b</sup></b> | 0.5558                     |
| NO <sub>2</sub> <sup>-</sup> + NH <sub>4</sub> <sup>+</sup> (μM)                 | <b>0.6005<sup>a</sup></b> | -0.4396                    | <b>-0.8011<sup>a</sup></b> | <b>0.6060<sup>c</sup></b>  |
| NO <sub>2</sub> <sup>-</sup> /O <sub>2</sub>                                     | <b>0.5692<sup>a</sup></b> | <b>-0.9212<sup>b</sup></b> | <b>-0.8404<sup>a</sup></b> | <b>0.6711<sup>c</sup></b>  |
| N <sub>2</sub> O (μM)                                                            | <b>0.6609<sup>a</sup></b> | 0.3164                     | <b>-0.7527<sup>b</sup></b> | <b>0.6940<sup>c</sup></b>  |
| N <sub>2</sub> O/NO <sub>2</sub> <sup>-</sup>                                    | -0.1196                   | <b>0.9422<sup>c</sup></b>  | <b>0.6064<sup>c</sup></b>  | -0.2644                    |
| N <sub>2</sub> O/NH <sub>4</sub> <sup>+</sup>                                    | -0.1833                   | <b>0.9589<sup>b</sup></b>  | <b>0.7569<sup>b</sup></b>  | 0.0195                     |
| N <sub>2</sub> O/ (NO <sub>2</sub> <sup>-</sup> + NH <sub>4</sub> <sup>+</sup> ) | -0.155                    | <b>0.9881<sup>b</sup></b>  | <b>0.7014<sup>c</sup></b>  | -0.0409                    |
